# Supplementary material
Source: PubMed Central journal article supplement (PMC5844803)

1 **Online Repository**

2

3 **IL-10, TGF- $\beta$  and glucocorticoid prevent the production of type 2 cytokines in human**  
4 **group 2 innate lymphoid cells**

5

6 **Noriko Ogasawara, MD, PhD<sup>1</sup>, Julie A. Puposki, MS<sup>1</sup>, Aiko I. Klingler, PhD<sup>1</sup>, Bruce K.**  
7 **Tan, MD, MS<sup>2</sup>, Ava R. Weibman, BA<sup>2</sup>, Kathryn E. Hulse, PhD<sup>1</sup>, Whitney W. Stevens, MD,**  
8 **PhD<sup>1</sup>, Anju T. Peters, MD<sup>1</sup>, Leslie C. Grammer, MD<sup>1</sup>, Robert P. Schleimer, PhD<sup>1,2</sup>, Kevin**  
9 **C. Welch, MD<sup>2</sup>, Stephanie S. Smith, MD<sup>2</sup>; David B. Conley, MD<sup>2</sup>; Joseph R. Raviv, MD<sup>3</sup>;**  
10 **Pejman Soroosh, PhD<sup>4</sup>, Omid Akbari, PhD<sup>5</sup>, Tetsuo Himi, MD, PhD<sup>6</sup>, Robert C. Kern,**  
11 **MD<sup>1,2</sup>, Atsushi Kato, PhD<sup>1,2\*</sup>.**

12 <sup>1</sup> Division of Allergy and Immunology, Department of Medicine, Northwestern University  
13 Feinberg School of Medicine, Chicago, IL 60611, USA.

14 <sup>2</sup> Department of Otolaryngology, Northwestern University Feinberg School of Medicine,  
15 Chicago, IL 60611, USA.

16 <sup>3</sup> Division of Otolaryngology-Head and Neck Surgery, NorthShore University HealthSystem,  
17 The University of Chicago, Pritzker School of Medicine, Evanston, IL 60201, USA.

18 <sup>4</sup> Janssen Research and Development, San Diego, CA 92121, USA.

19 <sup>5</sup> Department of Molecular Microbiology and Immunology, Keck School of Medicine,  
20 University of Southern California, Los Angeles, Los Angeles, CA 90033, USA

21 <sup>6</sup> Department of Otolaryngology, Sapporo Medical University School of Medicine, Sapporo,  
22 Japan

## 23 **Methods**

24

### 25 **Patients and tissue collection**

26 Patients with CRSwNP were recruited from the Otolaryngology clinic and the Northwestern  
27 Sinus Center of Northwestern Medicine. All patients met the criteria for CRSwNP as defined by  
28 the European Position Paper on Rhinosinusitis and Nasal Polyps 2012. Patients with an  
29 established immunodeficiency, pregnancy, coagulation disorder or diagnosis of Churg-Strauss  
30 syndrome or cystic fibrosis were excluded from the study. NP tissue was collected during  
31 endoscopic sinus surgery. Tonsil tissue was obtained when patients underwent tonsillectomy for  
32 chronic tonsillitis, recurrent acute tonsillitis or obstructive sleep apnea as collected by faculty of  
33 the Otolaryngology Department of Northwestern Medicine. Several patients were taking a  
34 variety of medications, including corticosteroids. Details of patients' characteristics are included  
35 in Table E1. All subjects signed informed consent and the study was approved by the  
36 Institutional Review Board of Northwestern University Feinberg School of Medicine (IRB  
37 Project Number: STU00080917). Human peripheral blood leukopaks (STEMCELL  
38 Technologies, Vancouver, BC, Canada) were obtained from healthy subjects for isolation of  
39 peripheral blood mononuclear cells (PBMC).

40

### 41 **Cell isolation and flow cytometric analysis**

42 Cells were isolated from tonsil and NP tissues using a previously described method. Tissue  
43 samples were weighed, washed by dPBS, fragmented and then incubated with 30 µg/ml DNase I  
44 and 1 mg/ml type I collagenase containing media at 4°C overnight. Following this, tissues were  
45 minced using a gentleMACS dissociator (Miltenyi Biotec, Auburn, CA) and the cells were

46 filtered through 70 µm nylon mesh (BD Biosciences, San Jose, CA). Cells were then treated with  
47 red blood cell lysis solution (Miltenyi Biotec) and washed with dPBS before counting and  
48 staining for flow cytometric analysis.

49 Cells were first treated with Aqua LIVE/DEAD fixable dead cell staining reagent  
50 (Invitrogen, Carlsbad, CA) as a live/dead discriminator. Cells were then incubated with an Fc  
51 Block reagent (Miltenyi Biotec) for 10 minutes at 4°C in the dark. All antibodies were obtained  
52 from BioLegend (San Diego, CA), unless otherwise stated. The following antibodies and  
53 dilutions were used to stain the surface of the cells: FITC anti-human Lineage Cocktail (CD3,  
54 CD14, CD16, CD19, CD20, CD56, 1:20), 2 µg/ml FITC anti-FcεRIa (AER-37), 4 µg/ml FITC  
55 anti-CD11c (Bu15), 4 µg/ml FITC anti-CD303 (201A), 5 µg/ml PE/Cy7 anti-CD3 (HIT3a), 2.5  
56 µg/ml PE/Cy7 anti-CD4 (RPA-T4), 1 µg/ml Brilliant Violet 421 anti-CD127 (A019D5), 7.5  
57 µg/ml PE/Dazzle 594 anti-CRTH2 (Bim16), 1.25 µg/ml PerCP/Cy5.5 anti-CD45 (HI30), 5  
58 µg/ml APC/Cy7 anti-CD161 (HP-3G10), 10 µg/ml Alexa Fluor 647 anti-IL-10RA (714212,  
59 Novus Biologicals, Southpark Way, CO), 10 µg/ml Alexa Fluor 647 control mouse IgG2b  
60 (MPC-11, Novus Biologicals), 10 µg/ml PE anti-IL-10RB (90220, R&D systems, Minneapolis,  
61 MN), 5 µg/ml PE anti-TGFBR2 (25508, R&D systems) and 10 µg/ml PE control mouse IgG1  
62 (11711, R&D systems). Cells were stained for 30 minutes at 4°C in the dark, and washed with  
63 MACS buffer (Miltenyi Biotec). Cells were fixed with a BD Cytofix/Cytoperm Kit,  
64 resuspended in MACS buffer and stored at 4°C in the dark before analysis on a CytoFLEX flow  
65 cytometer (Beckman Coulter, Indianapolis, IN). All analysis was performed with FlowJo  
66 software, version 10.1 (TreeStar, Ashland, OR), and each experiment contained the proper  
67 single-stained control beads (BD Biosciences and eBiosciences) and fluorescence minus one  
68 (FMO) negative controls.

69

70 **ILC2 sorting**

71 Human PBMC were isolated from a human peripheral blood leukopak by centrifugation on a  
72 Ficoll-Paque PREMIUM density gradient (GE Healthcare, Piscataway, NJ). After lysis of red  
73 blood cells, PBMC were incubated with Fc Block reagent and FITC anti-human Lineage  
74 Cocktail for 15 minutes at 4°C in the dark. FITC<sup>+</sup> (Lin<sup>+</sup>) cells were depleted by human FITC  
75 positive selection kit (STEMCELL Technologies) using Big EasySep Magnets (STEMCELL  
76 Technologies). After depletion of Lin<sup>+</sup> cells, cells were counted and further stained with FITC  
77 anti-FcεRIa, FITC anti-CD11c, FITC anti-CD303, PE anti-CD4, Brilliant 421 anti-human CD45,  
78 Alexa Fluor 647 anti-CRTH2, PE/Cy7 anti-CD127 and APC/Cy7 anti-CD161. We then sorted  
79 ILC2s as CD45<sup>+</sup>, Lin (FITC)<sup>-</sup>, CD4<sup>-</sup>, CD127<sup>+</sup>, CRTH2<sup>+</sup>, CD161<sup>+</sup> cells with a BD FACSAria  
80 SORP-5-laser cell sorter (BD Biosciences) at the Robert H Lurie Comprehensive Cancer Center  
81 at Northwestern University.

82 We also sorted ILC2 from NP tissues from patients with CRSwNP, a disease characterized  
83 by type 2 inflammation with high levels of eosinophilia, ILC2 infiltration and type 2 cytokines  
84 including IL-5 and IL-13.<sup>E1</sup> After the isolation of cells from NP tissues, cells were first treated  
85 with Aqua dead cell staining reagent. Cells were blocked by Fc Block reagent and then incubated  
86 with FITC anti-human Lineage Cocktail (CD3, CD14, CD16, CD19, CD20, CD56), FITC anti-  
87 CD11c, FITC anti-CD303, PE/Cy7 anti-FcεRIa, BUV395 anti-CD4, Alexa Fluor 700 anti-CD45,  
88 Alexa Fluor 647 anti-CRTH2, BV421 anti-CD127 and APC/Cy7 anti-CD161. We sorted ILC2  
89 as Aqua<sup>-</sup>, CD45<sup>+</sup>, Lin (FITC)<sup>-</sup>, CD4<sup>-</sup>, FcεRIa<sup>-</sup>, CD127<sup>+</sup>, CRTH2<sup>+</sup>, CD161<sup>+</sup> cells with a BD  
90 FACSAria SORP-5-laser cell sorter. The purity of ILC2s was always greater than 95% (not  
91 shown).

92

93 **Cell culture**

94 PBMC were stained with FITC anti-human Lineage Cocktail, FITC anti-FcεRIa, FITC anti-  
95 CD11c, FITC anti-CD303, Alexa Fluor 647 anti-CRTH2, Brilliant Violet 421 anti-CD127 and  
96 Alexa Fluor 700 anti-CD161, and stained PBMC were equilibrated in RPMI 1640 medium  
97 (Invitrogen) supplemented with 10% FBS (Invitrogen), 100 U/ml penicillin, and 100 µg/ml  
98 streptomycin (Invitrogen) for 2 hours before stimulation. Stained PBMC were stimulated with 1-  
99 10 ng/ml IL-10 (R&D systems) for 15 minutes and the reaction was stopped by adding BD  
100 Cytofix Fixation Buffer (BD Biosciences). Fixed cells were permeabilized by Phosflow Perm  
101 Buffer III (BD Biosciences) for 30 minutes on ice in the dark. After washing, cells were stained  
102 with PE/Cy7 anti-CD45 (HI30), PerCP/Cy5.5 anti-CD20 (H1) and PE anti-STAT3 (pY705)  
103 (4/P-STAT3, BD Biosciences) for 30 minutes at 4°C in the dark. The level of phospho-STAT3 in  
104 ILC2s was detected by a CytoFLEX. Data analysis was performed with FlowJo software.

105 Sorted blood ILC2s and NP ILC2s (10,000 cells/ml) were suspended in RPMI 1640 medium  
106 supplemented with 25 IU/ml IL-2 (Prometheus, San Diego, CA), 10% FBS, 100 U/ml penicillin,  
107 and 100 µg/ml streptomycin and were cultured in the presence or absence of 10 ng/ml IL-33  
108 (BioLegend), 10 ng/ml TSLP (R&D systems), 10 ng/ml IL-10 (R&D systems), 20 ng/ml TGF-β1  
109 (R&D systems), 0.01% DMSO (Sigma-Aldrich, St. Louis, MO), 100 nM dexamethasone  
110 (Sigma-Aldrich) and 100 nM RU-486 (Sigma-Aldrich) for 4 days. We did dose-dependent  
111 experiments using 1-20 ng/ml cytokines (n=2, not shown) and then selected these concentrations  
112 for this study. The concentrations of IL-4, IL-5, IL-9 and IL-13 in cell-free supernatants were  
113 measured using a MILLIPLEX MAP Human Cytokine/Chemokine Panel from EMD Millipore  
114 (Billerica, MA). The minimal detection limits for IL-4, IL-5, IL-9 and IL-13 are 3.2 pg/ml.

115

116 **Statistics**

117 All data are reported as the as the mean  $\pm$  SEM. Differences between groups were analyzed  
118 using the Paired *t* test or the RM 1-way ANOVA Tukey's multiple comparison test. A p value of  
119 less than 0.05 was considered significant.

120

121 **Table E1 Subject characteristics**

122

|                            | Tonsil<br>(n=6)<br>n (%) | NP (IL-10R)<br>(n=10)<br>n (%) | NP (TGFBR2)<br>(n=10)<br>n (%) | NP (ILC2 culture)<br>(n=8)<br>n (%) |
|----------------------------|--------------------------|--------------------------------|--------------------------------|-------------------------------------|
| Female                     | 4 (67)                   | 4 (40)                         | 4 (40)                         | 2 (25)                              |
| Atopy                      | 1 (17)                   | 8 (80)                         | 4 (40)                         | 4 (50)                              |
| Asthma                     | 3 (50)                   | 7 (70)                         | 2 (20)                         | 5 (63)                              |
| Aspirin sensitivity        | 0 (0)                    | 1 (10)                         | 1 (10)                         | 0 (0)                               |
| Nasal steroid              | 2 (33)                   | 3 (30)                         | 1 (17)                         | 2 (25)                              |
| Inhaled steroid            | 0 (0)                    | 3 (30)                         | 1 (10)                         | 3 (38)                              |
| Oral steroid               | 0 (0)                    | 3 (30)                         | 2 (20)                         | 1 (13)                              |
| Age (y), median<br>(range) | 22* (18-38)#             | 58 (42-71)                     | 51 (28-80)                     | 39 (28-70)                          |

123 \*median, #(range).

124

125

126 **References**

- 127 E1. Paposki JA, Klingler AI, Tan BK, Soroosh P, Banie H, Lewis G, et al. Group 2 innate  
128 lymphoid cells are elevated and activated in chronic rhinosinusitis with nasal polyps.  
129 *Immun Inflamm Dis* 2017; **5**:233-243

130

131



132 **Supplemental figure legends**

133

134

135 **Figure E1. Gating strategy to identify ILC2s in human peripheral blood.**

136 Representative flow cytometric plots for ILC2s in peripheral blood are shown. We gated on  
137 single, live CD45 positive cells and excluded granulocytes (side scatter high). We then assessed  
138 ILC2s in the lineage (CD3, CD11c, CD14, CD16, CD19, CD20, CD56, FcεRIα, CD303)  
139 negative population as CD127, CRTH2 and CD161 triple positive cells.

140

141 **Figure E2. Presence of IL-10 receptor on human ILC2s.**

142 Representative histograms of flow cytometric plots for IL-10RA (A) and IL-10RB (A-C) in  
143 ILC2s from a tonsil (A), a blood sample (B) and a NP (C) are shown. Levels of cell surface  
144 expression of IL-10 receptors on ILC2s from tonsils (A, n=6), blood (B, n=10) and NPs (C,  
145 n=10) are shown by geometric mean fluorescence intensity (gMFI). \*\* p<0.01, \*\*\* p<0.001, by  
146 the Paired *t* test.

147

148 **Figure E3. Presence of receptors for IL-10 and TGF-β on human Th2 cells.**

149 Representative flow cytometric plots for Th2 cells and ILC2s in NP are shown within the  
150 singlets, Aqua- and granulocytes (SSChigh) excluded population (A). We gated on single, live  
151 CD45 positive cells and excluded granulocytes (side scatter high). We then assessed ILC2s as  
152 lineage-, CD127<sup>+</sup>, CRTH2<sup>+</sup> CD161<sup>+</sup> cells and Th2 cells as CD4<sup>+</sup>, CRTH2<sup>+</sup> cells (A). Levels of  
153 cell surface expression of IL-10RA and TGFBR2 on Th2 cells from blood (B, n=4) and NPs (C,  
154 n=4) are shown by geometric mean fluorescence intensity (gMFI). We normalized the data by  
155 calculating the gMFI ratio of receptor to isotype IgG and compared expression of receptors

156 between Th2 cells and ILC2s in blood (n=4) and NP tissue (n=4) (D). \*  $p < 0.05$ , by the Paired  $t$   
157 test.

158

159 **Figure E4. Effect of IL-10 and TGF- $\beta$  on IL-33 stimulated human ILC2s.**

160 Sorted blood ILC2s were cultured in the presence or absence of 10 ng/ml IL-33, 10 ng/ml IL-10  
161 (A, n=8) and 20 ng/ml TGF- $\beta$ 1 (B, n=5) for 4 days. The concentrations of IL-4, IL-5, IL-9 and  
162 IL-13 were measured by Luminex. \*  $p < 0.05$ , \*\*  $p < 0.01$ , by one-way ANOVA.

163

164 **Figure E5. RU-486 inhibited dexamethasone-mediated suppression in human ILC2s.**

165 Sorted blood ILC2s were cultured in the presence or absence of 10 ng/ml IL-33, 10 ng/ml TSLP,  
166 0.01% DMSO (vehicle control), 100 nM dexamethasone (Dex) and 100 nM RU-486 (RU) for 4  
167 days (n=3). The concentrations of IL-5 and IL-13 were measured by Luminex. \*  $p < 0.05$ , by the  
168 Paired  $t$  test.

169

170 **Figure E6. IL-10, TGF- $\beta$  and dexamethasone inhibit cytokine production in NP ILC2s.**

171 Sorted NP ILC2s were cultured in the presence or absence of 10 ng/ml IL-10 (n=8), 20 ng/ml  
172 TGF- $\beta$ 1 (n=8) and 100 nM dexamethasone (Dex, n=4) for 4 days. The concentrations of IL-5  
173 were measured by Luminex. Four NP donors were excluded from the Dex study because these  
174 patients were taking corticosteroids before the surgery.

175

176

177

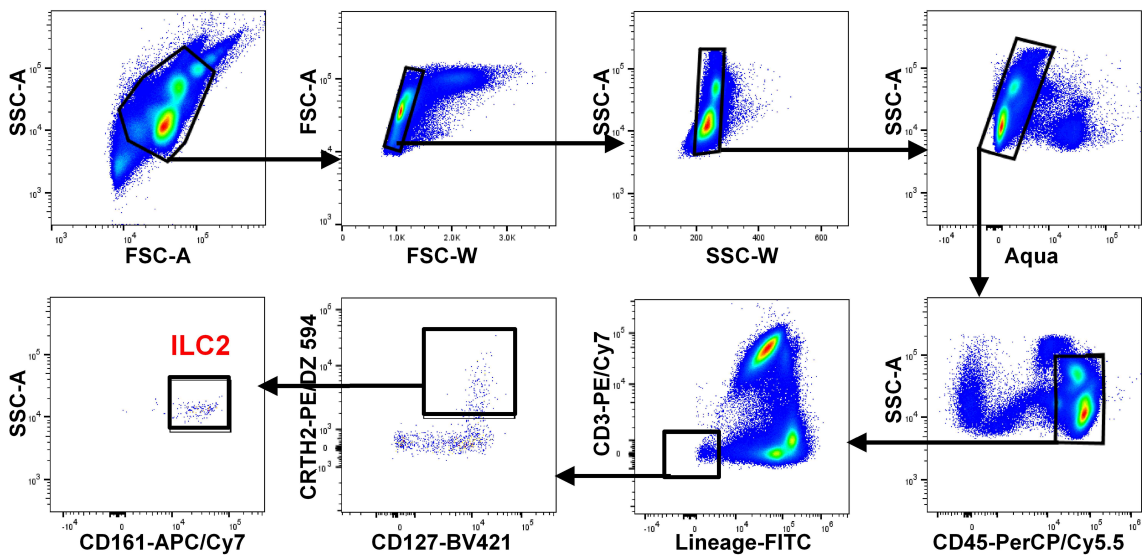

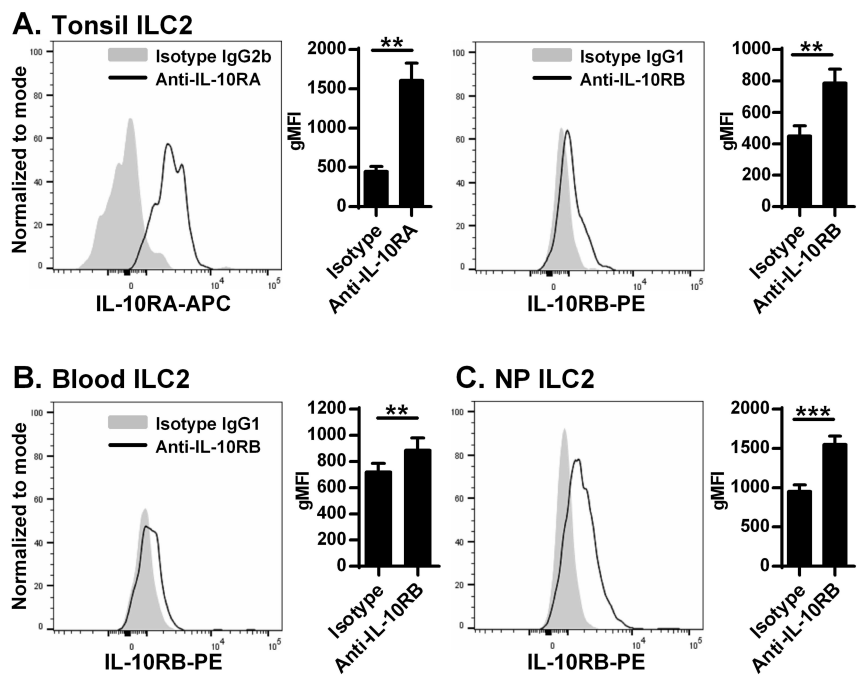

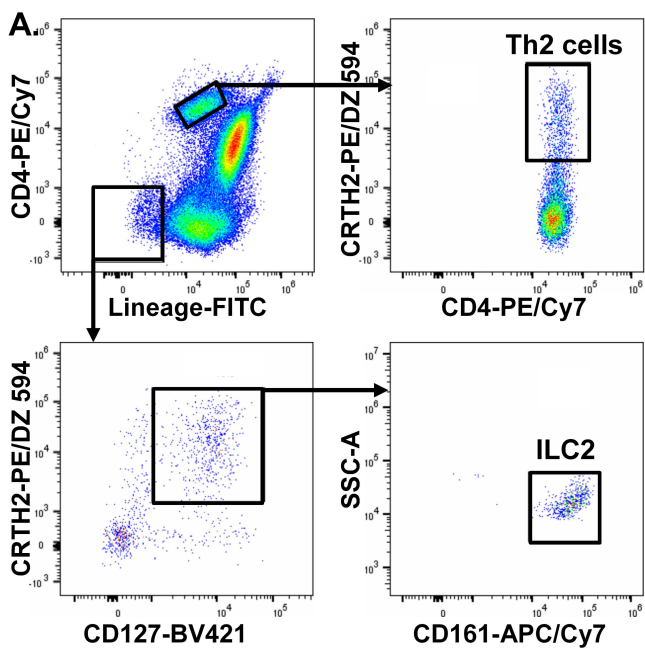

**B. Blood Th2 cells**

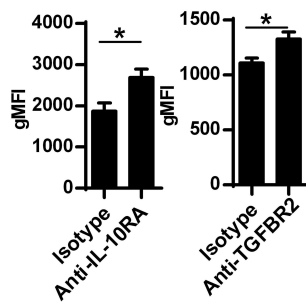

**C. NP Th2 cells**

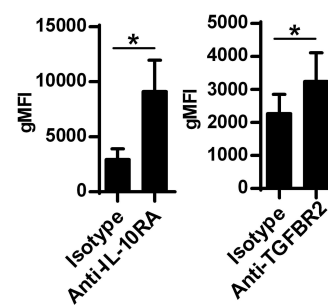

**D.**

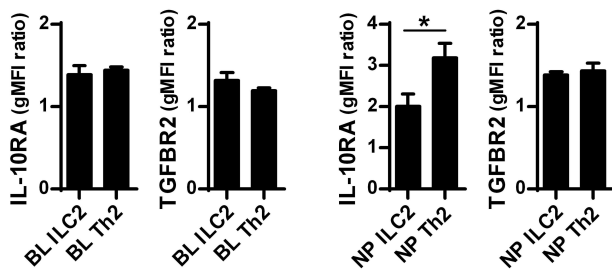

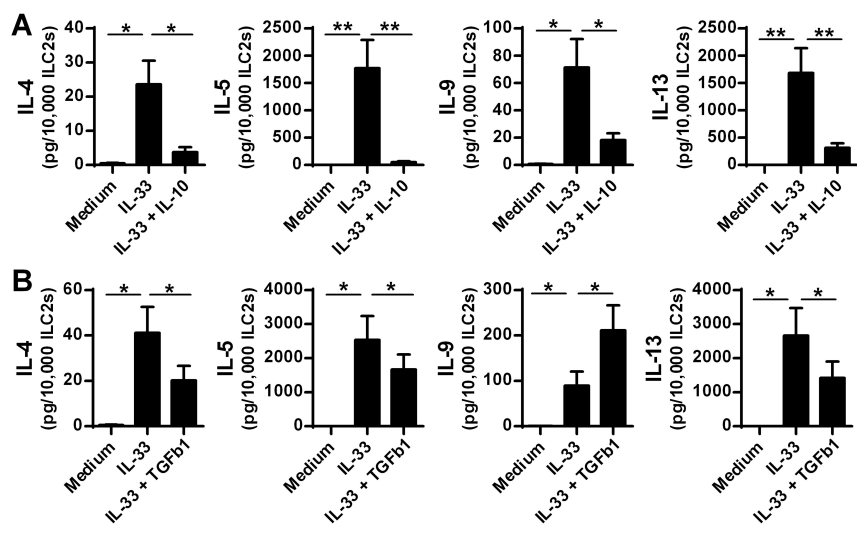

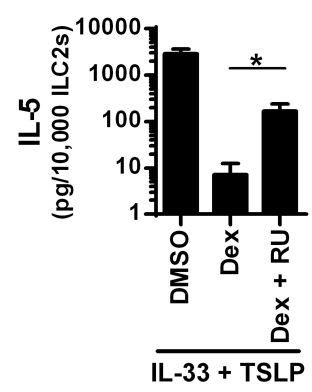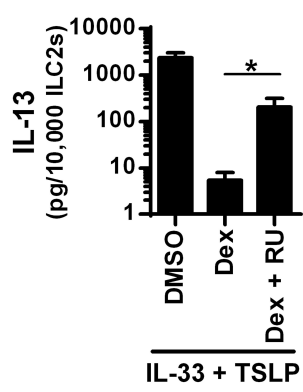

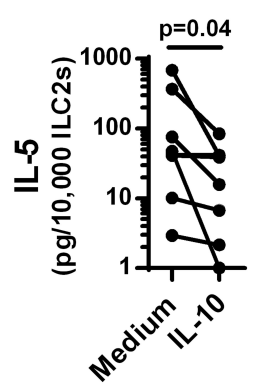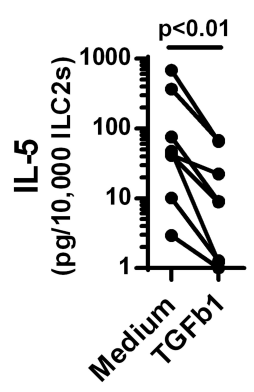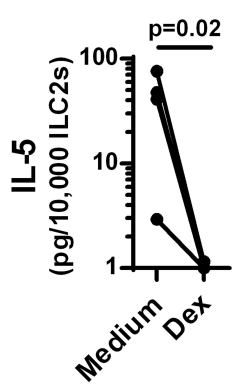

Supplement: NIHMS914913-supplement-supplement_1.pdf [file NIHMS914913-supplement-supplement_1.pdf]
